# Supplementary material
Source: PubMed Central journal article supplement (PMC10915331)
Supplement: ajcr0014-0832-f9.pdf [file ajcr0014-0832-f9.pdf]

## Macrophage regulate B cell PD-L1 in HCC

**Table S1.** Flow cytometry antibody used in our study

| Antibody                                                       | Company    | Clone   |
|----------------------------------------------------------------|------------|---------|
| PE anti-human CD38 Antibody                                    | Biolegend  | HIT2    |
| PerCP/Cyanine5.5 anti-human CD19 Antibody                      | Biolegend  | HIB19   |
| Brilliant Violet 510™ anti-human CD3 Antibody                  | Biolegend  | OKT3    |
| Brilliant Violet 421™ anti-human CD274 (B7-H1, PD-L1) Antibody | Biolegend  | 29E.2A3 |
| Alexa Fluor® 700 anti-human CD45 Antibody                      | Biolegend  | 2D1     |
| FITC anti-human CD163 Antibody                                 | Biolegend  | GHI/61  |
| Human/Mouse CXCL12/SDF-1 PE-conjugated Antibody                | Bio-techne | IC350P  |
| FITC anti-human CD14 Antibody                                  | Biolegend  | HCD14   |

# Macrophage regulate B cell PD-L1 in HCC

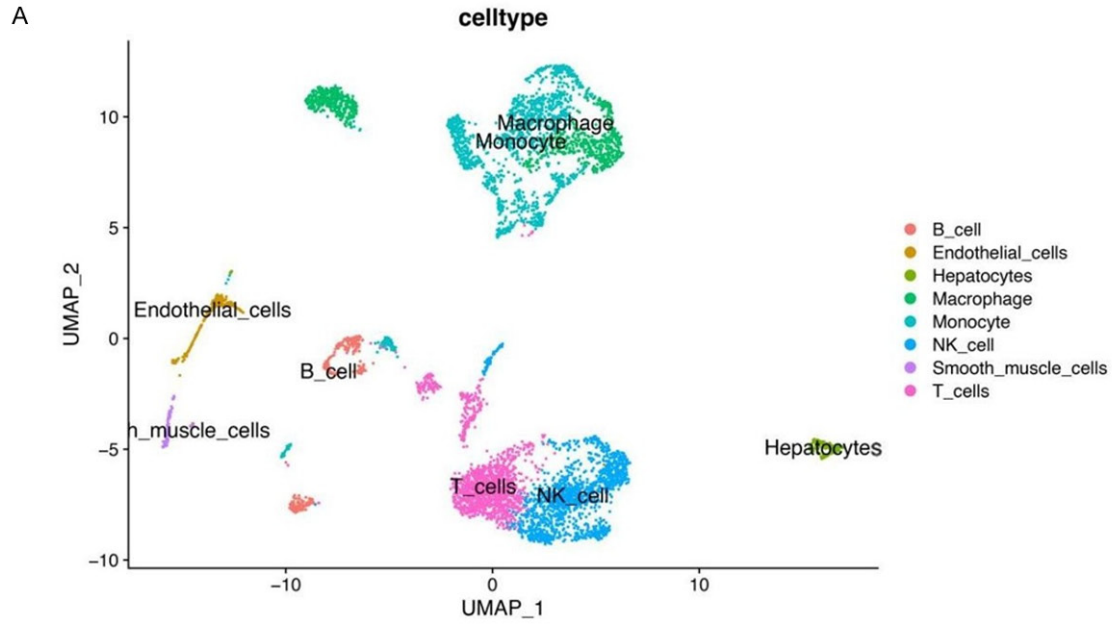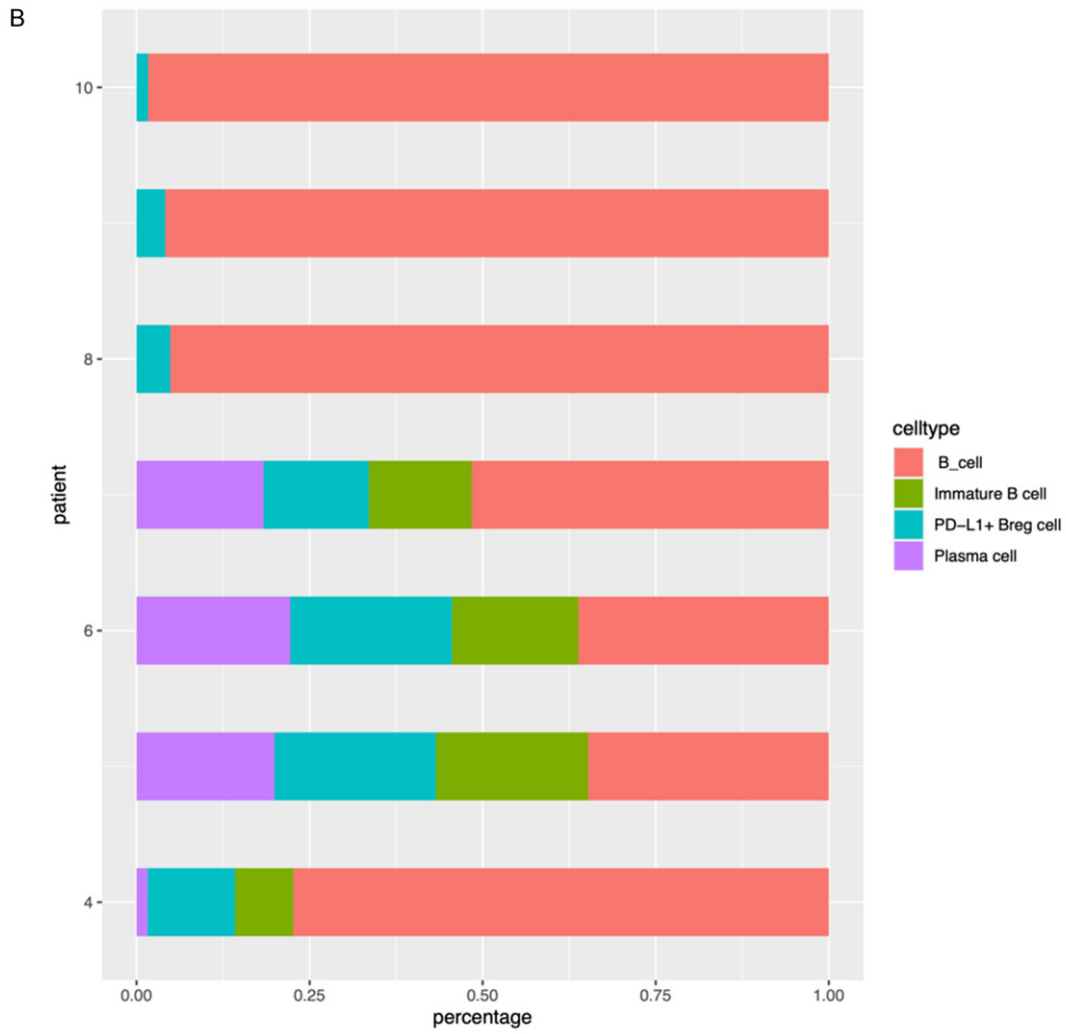

# Macrophage regulate B cell PD-L1 in HCC

C

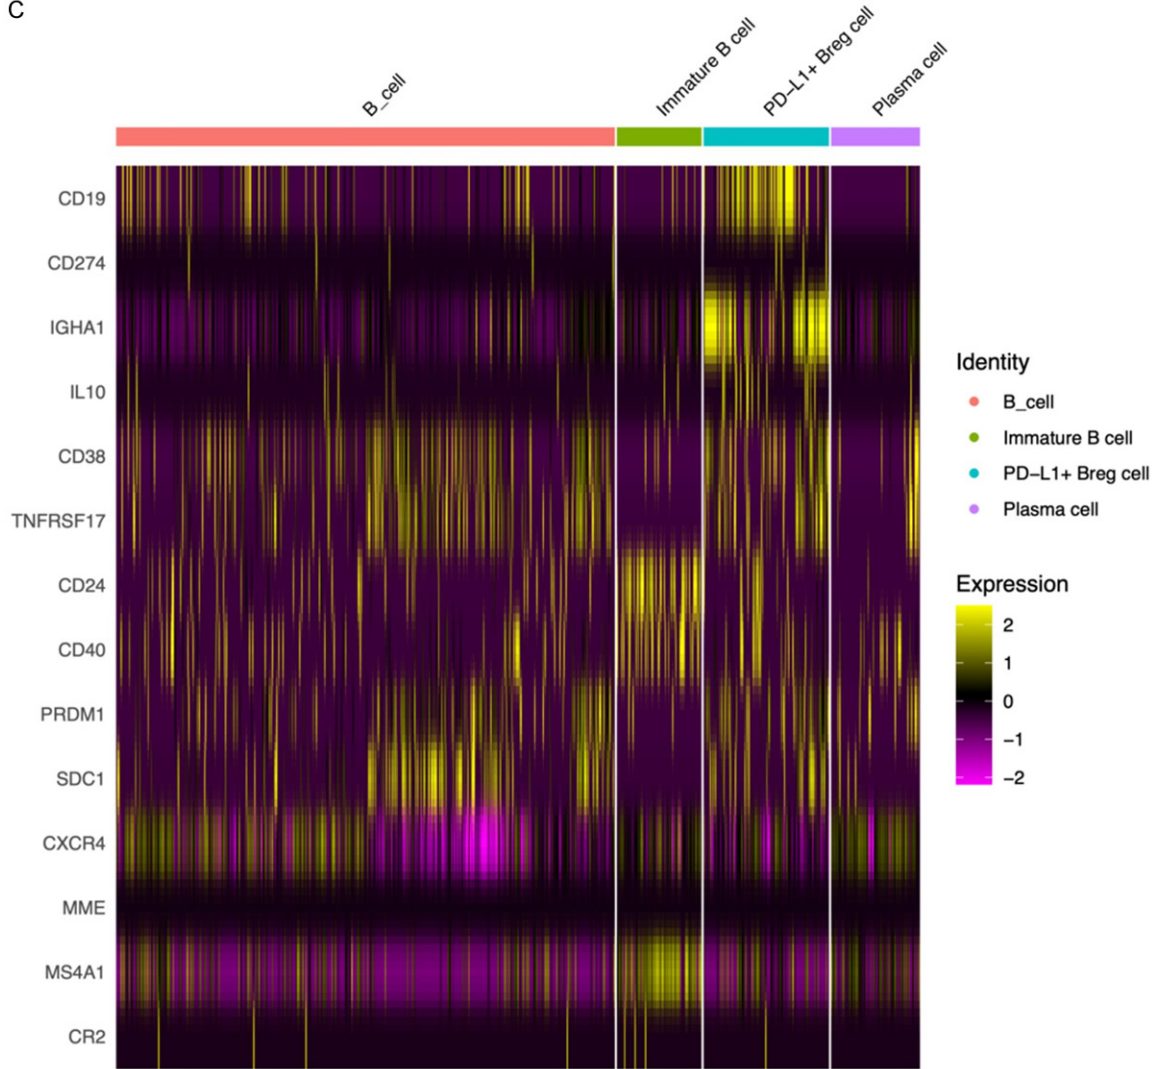

**Figure S1.** A. The UMAP plot of cells from one patient, representing eight distinct clusters. Each dot corresponds to one single cell. B. The percentage of four different subset of HCC infiltrating B cell in each sample. C. Heatmap of hallmark gene of PD-L1+Breg cell in different cluster of B cell.

## Macrophage regulate B cell PD-L1 in HCC

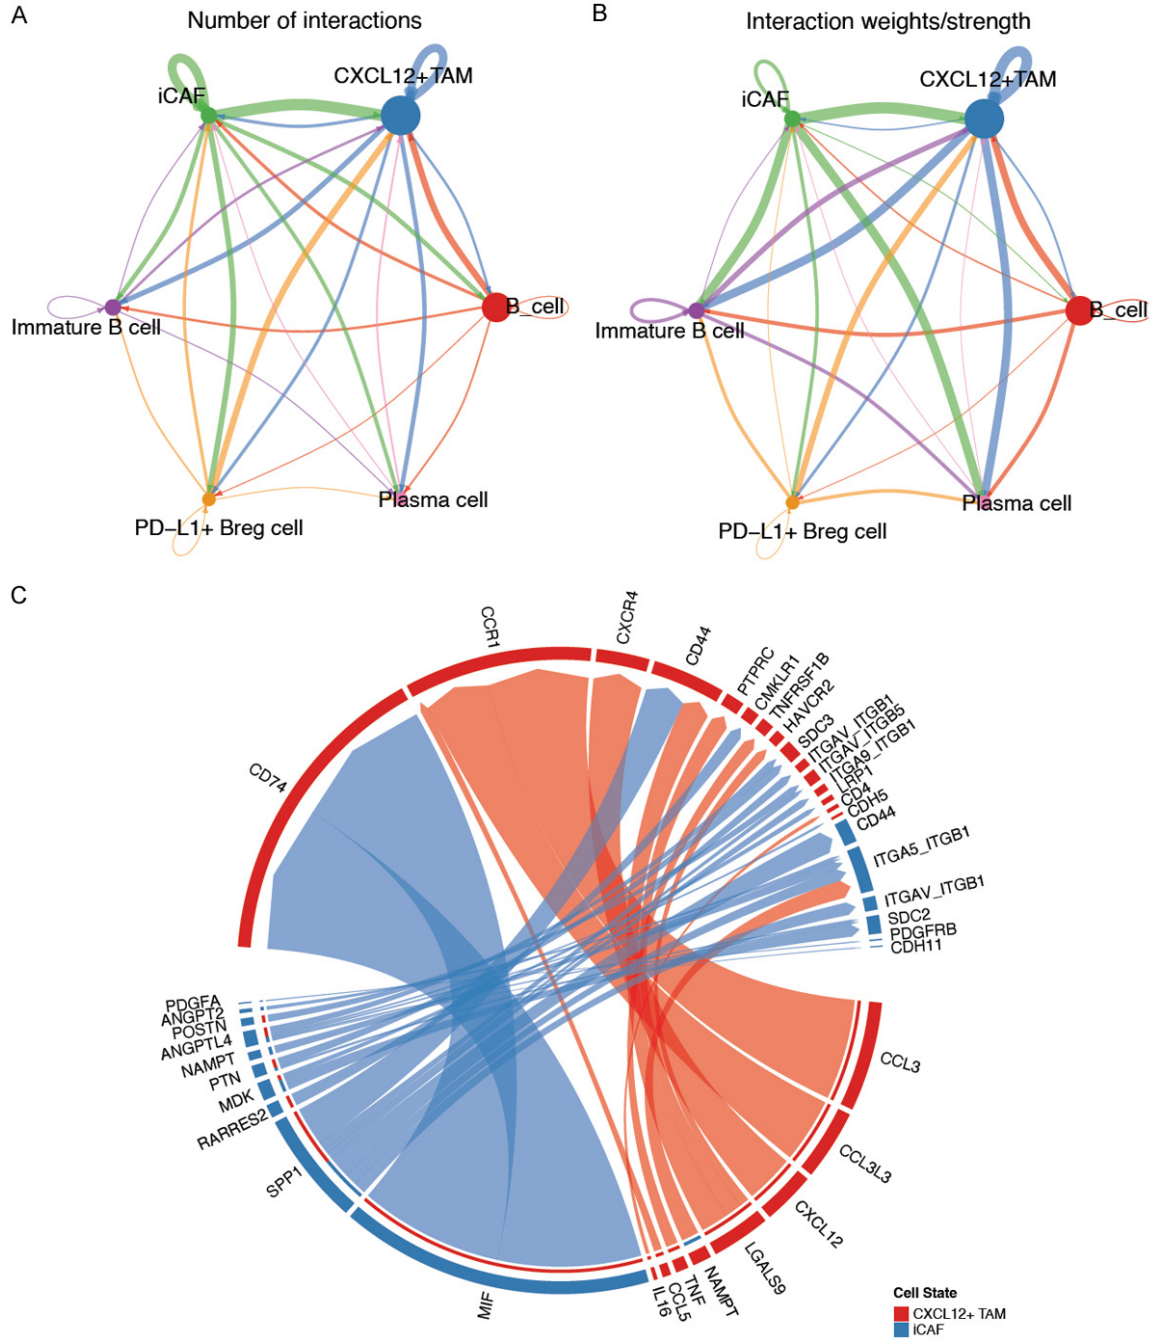

**Figure S2.** The MIF/CD74 axis plays an important role in iCAFs-CXCL12+ TAM interaction. A. A circle plot of the number of cellular communications in six identified types of cell populations in liver tissue. The width represents the number of cell interactions. B. A circle plot of the weights/strength of the number of cellular communications in six identified types of cell populations in liver tissue. The width represents the weights/strength of the interaction. C. A chord diagram of cell-to-cell contact interactions from CXCL12+ TAMs toward iCAF.

# Macrophage regulate B cell PD-L1 in HCC

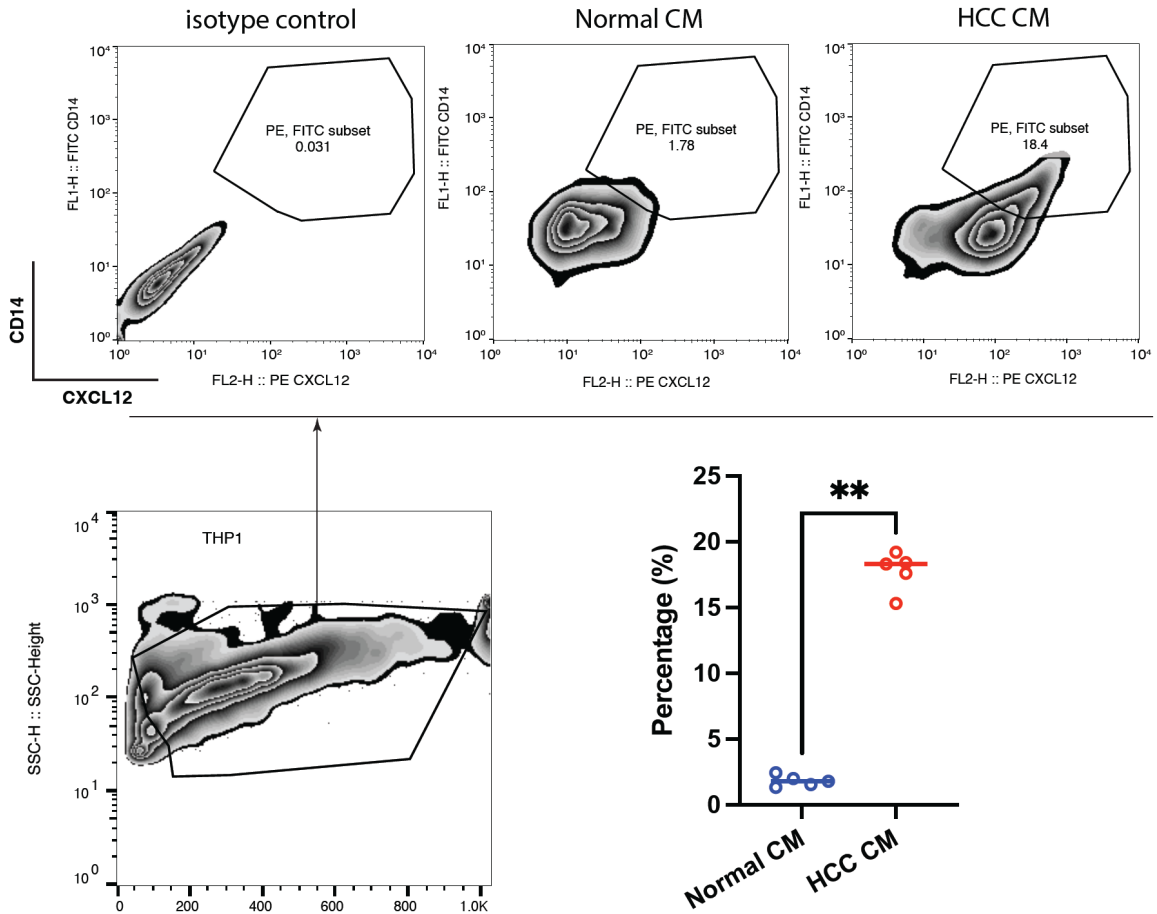

**Figure S3.** Determination and gating strategy of CXCL12 expression in macrophage (derived from THP1) induced by conditional medium of normal and HCC tissues respectively analyzed by flow cytometry.

## Macrophage regulate B cell PD-L1 in HCC

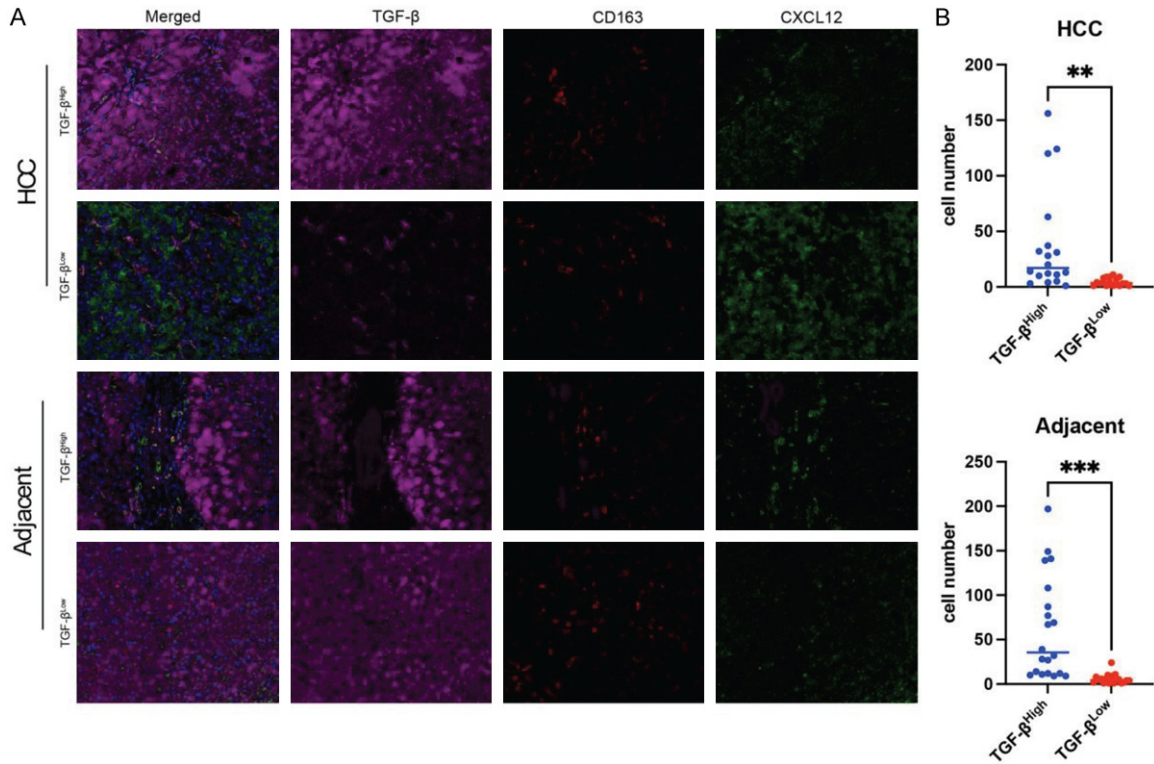

**Figure S4.** CXCL12+ TAMs aggregated and secreted more TGF- $\beta$  in HCC than in adjacent tissues. A. Representative figures for multiple-color staining for TGF- $\beta$ , CD163, and CXCL12 expression in human HCC and adjacent samples. B. Dot plots showing cell numbers of TGF- $\beta$  high and TGF- $\beta$  low in HCC and adjacent tissues. Red represents TGF- $\beta$  low and blue represents TGF- $\beta$  high. Data are presented as mean  $\pm$  SEM and were analyzed using Student's t-test (\*\*\* $p$ <0.001, \*\* $p$ <0.01).

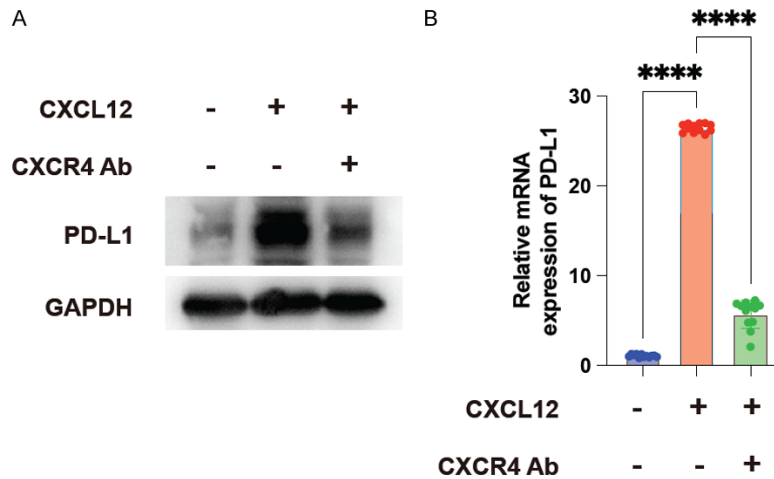

**Figure S5.** CXCL12-secreting TAMs regulate PD-L1+ Bregs through the CXCL12/CXCR4 axis. A. Western blot showing PD-L1 levels with CXCL12 treatment and CXCR4 antibody interference. GAPDH is used as a baseline reference. B. Bar graph depicting changes in PD-L1 mRNA after treatment with CXCL12 and blockage with CXCR4 antibody, indicating a significant change in expression (\*\*\*\* $p$ <0.0001).

## Macrophage regulate B cell PD-L1 in HCC

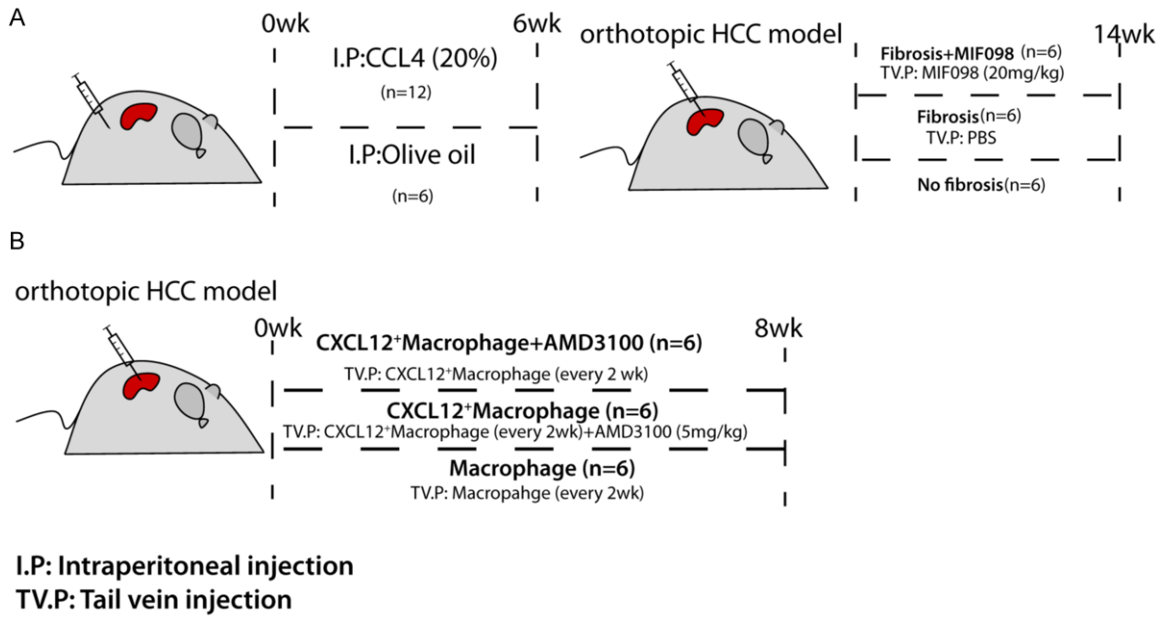

Figure S6. Experimental design of orthotopic HCC model.

## Macrophage regulate B cell PD-L1 in HCC

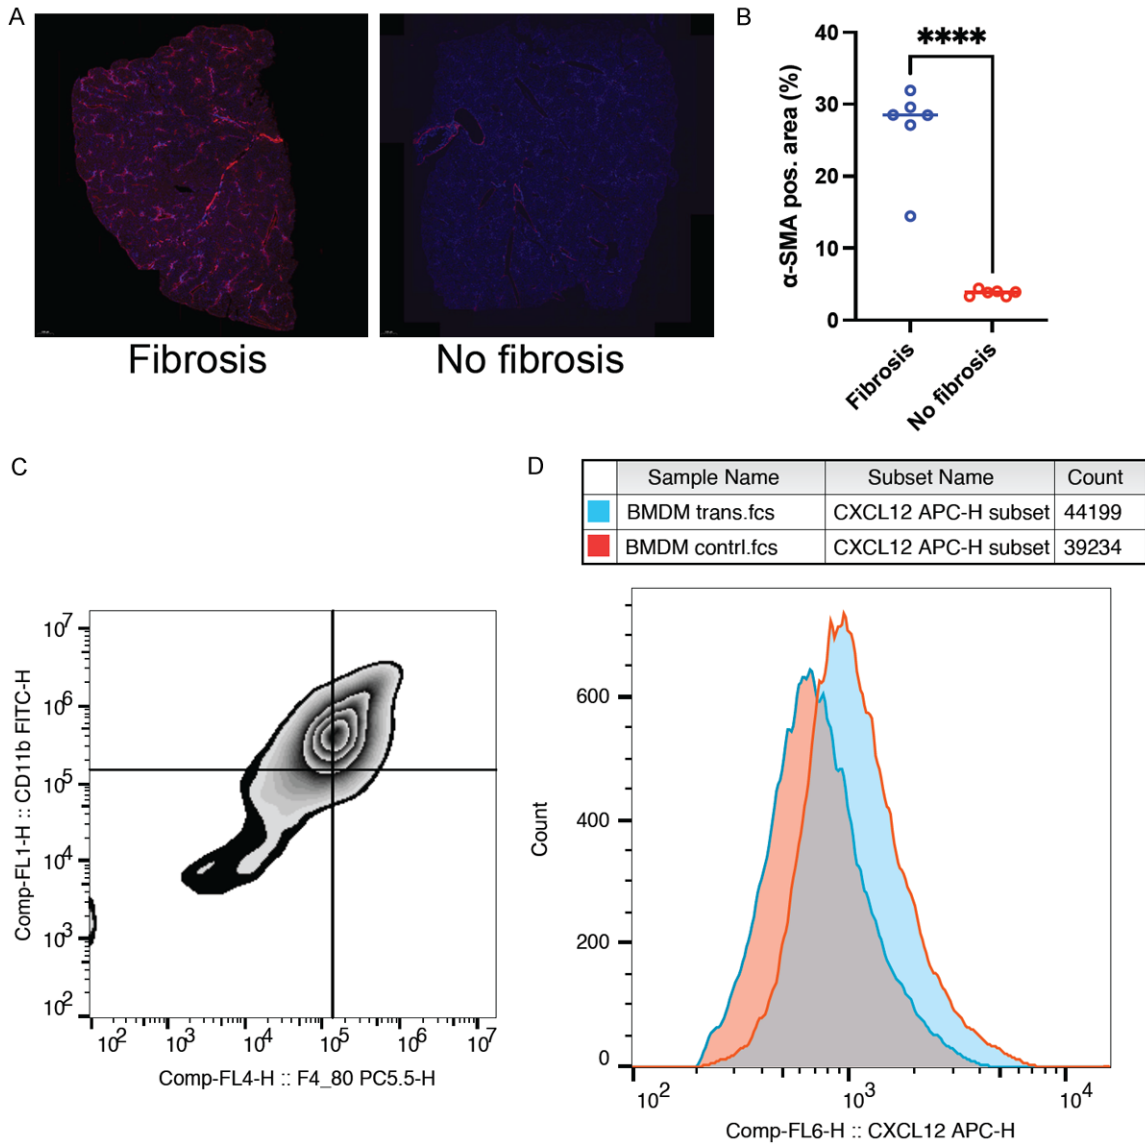

**Figure S7.** A.  $\alpha$ -SMA staining of mouse liver tissues. B. Comparison of the ratio of  $\alpha$ -SMA positive area in CCL4 treated and normal control mice. C, D. Expression of *cxcl12* in control and *cxcl12* transduced macrophage.



## Macrophage regulate B cell PD-L1 in HCC

**Table S2.** Hallmarker gene of PD-L1+Breg cell compared with other cluster of B cells

| gene           | logFC       | AveExpr      | t           | P.Value  | adj.P.Val   | B            |
|----------------|-------------|--------------|-------------|----------|-------------|--------------|
| IGHA1          | 2.1180681   | -2.50E-16    | 13.12577205 | 1.57E-31 | 4.03E-27    | 59.58806589  |
| IGHA2          | 2.081733459 | 2.77E-17     | 12.77894948 | 2.90E-30 | 3.73E-26    | 56.67683402  |
| BRMS1L         | 1.038069146 | -0.01047552  | 6.290636246 | 1.09E-09 | 7.26E-06    | 9.696991135  |
| JCHAIN         | 1.193011828 | -1.86E-16    | 6.284400325 | 1.13E-09 | 7.26E-06    | 9.662157137  |
| KLHL14         | 1.184504147 | -6.67E-18    | 6.233876275 | 1.51E-09 | 7.74E-06    | 9.380913387  |
| PDIA4          | 1.145251994 | -4.20E-18    | 6.002533022 | 5.49E-09 | 2.35E-05    | 8.115781413  |
| CCNB2          | 1.127836447 | -0.000921724 | 5.963406047 | 6.80E-09 | 2.50E-05    | 7.905531963  |
| IL10           | 1.133417828 | 1.28E-17     | 5.933337701 | 8.02E-09 | 2.58E-05    | 7.744699378  |
| ZNF341         | 1.027904135 | -0.007511131 | 5.896213547 | 9.82E-09 | 2.80E-05    | 7.54701697   |
| RP11-1212A22.4 | 0.96276259  | -0.010208176 | 5.752493079 | 2.13E-08 | 5.48E-05    | 6.791077265  |
| SLC16A6        | 0.989822565 | -0.006082746 | 5.520923785 | 7.20E-08 | 0.000159251 | 5.60483825   |
| DUSP5          | 1.060920955 | 1.36E-16     | 5.514720698 | 7.43E-08 | 0.000159251 | 5.573608867  |
| DDOST          | 1.045721964 | -1.21E-16    | 5.428056047 | 1.16E-07 | 0.000229504 | 5.140313712  |
| CCR10          | 1.037789818 | 1.16E-16     | 5.382971473 | 1.46E-07 | 0.000257953 | 4.917142972  |
| CD27           | 1.036736232 | 2.47E-16     | 5.376990497 | 1.50E-07 | 0.000257953 | 4.887652454  |
| ITM2C          | 1.027955979 | -1.09E-16    | 5.327213598 | 1.94E-07 | 0.000311007 | 4.643270638  |
| VIMP           | 1.025529371 | 1.87E-16     | 5.313477583 | 2.07E-07 | 0.000313656 | 4.576165217  |
| CDCA3          | 0.992486653 | -3.97E-18    | 5.127317698 | 5.22E-07 | 0.000745517 | 3.680993445  |
| MCM8           | 0.888118545 | -0.008946227 | 5.102738637 | 5.88E-07 | 0.000792556 | 3.564805715  |
| HARBI1         | 0.878116965 | -0.00906989  | 5.093164944 | 6.16E-07 | 0.000792556 | 3.519677285  |
| CLDN3          | 0.720644516 | -0.017509292 | 4.993308133 | 9.98E-07 | 0.001222234 | 3.053248869  |
| CRY1           | 0.955366963 | 3.42E-18     | 4.92008     | 1.41E-06 | 0.001653424 | 2.716191422  |
| MYDGF          | 0.928595791 | -2.54E-16    | 4.771803026 | 2.83E-06 | 0.002722143 | 2.046756668  |
| LINC00092      | 0.746719312 | -0.015251557 | 4.728451543 | 3.46E-06 | 0.002722143 | 1.854365931  |
| RP11-16E12.1   | 0.746717627 | -0.015228949 | 4.728451543 | 3.46E-06 | 0.002722143 | 1.854365931  |
| TMTC2          | 0.746717161 | -0.015222704 | 4.728451543 | 3.46E-06 | 0.002722143 | 1.854365931  |
| POLE2          | 0.746713798 | -0.015177601 | 4.728451543 | 3.46E-06 | 0.002722143 | 1.854365931  |
| CRYBA4         | 0.746695248 | -0.014928802 | 4.728451543 | 3.46E-06 | 0.002722143 | 1.854365931  |
| RP13-58209.7   | 0.746688775 | -0.014841977 | 4.728451543 | 3.46E-06 | 0.002722143 | 1.854365931  |
| CD274          | 0.512658884 | -0.003733405 | 2.679607594 | 3.46E-06 | 0.002722143 | -5.409330346 |
| SMOC1          | 0.746687263 | -0.014821697 | 4.728451543 | 3.46E-06 | 0.002722143 | 1.854365931  |
| C6orf52        | 0.746653948 | -0.014374868 | 4.728451543 | 3.46E-06 | 0.002722143 | 1.854365931  |
| CD226          | 0.73549686  | -0.01469323  | 4.727869221 | 3.47E-06 | 0.002722143 | 1.851791944  |
| AE000662.93    | 0.724587254 | -0.01531844  | 4.726100883 | 3.49E-06 | 0.002722143 | 1.843977199  |
| RP11-244H3.4   | 0.9091271   | -0.000926225 | 4.712384533 | 3.72E-06 | 0.002754649 | 1.783446909  |
| TANC2          | 0.688830532 | -0.017184415 | 4.710663737 | 3.75E-06 | 0.002754649 | 1.775863772  |
| TXNDC5         | 0.914058944 | 1.89E-16     | 4.691688539 | 4.09E-06 | 0.00292059  | 1.692403519  |
| DNAJB11        | 0.899399822 | 4.91E-17     | 4.61117783  | 5.89E-06 | 0.004089521 | 1.341537608  |
| GNS            | 0.898341958 | 2.79E-17     | 4.605378467 | 6.04E-06 | 0.004089521 | 1.316467791  |
| EXPH5          | 0.605190314 | -0.020583779 | 4.595652168 | 6.31E-06 | 0.004162521 | 1.274484051  |
| SFT2D3         | 0.599017707 | -0.020786415 | 4.581508481 | 6.73E-06 | 0.004242098 | 1.213570561  |
| APTR           | 0.859175683 | -0.003368799 | 4.567671898 | 7.16E-06 | 0.004242098 | 1.154138107  |
| NEDD4L         | 0.797642911 | -0.008717122 | 4.564832592 | 7.25E-06 | 0.004242098 | 1.141961792  |
| PTPRG          | 0.849894889 | -0.00420908  | 4.564655911 | 7.25E-06 | 0.004242098 | 1.141204318  |
| HSP90B1        | 0.890870021 | -4.65E-16    | 4.564456458 | 7.26E-06 | 0.004242098 | 1.140349244  |
| RP11-455F5.5   | 0.795346522 | -0.008807193 | 4.557777146 | 7.48E-06 | 0.004273227 | 1.111733242  |
| PIIB           | 0.88825791  | 1.25E-16     | 4.550167099 | 7.74E-06 | 0.00432444  | 1.0791743    |
| HBSIL          | 0.872828126 | 6.31E-18     | 4.465932262 | 1.12E-05 | 0.006140545 | 0.72196411   |
| CD38           | 0.871927688 | -1.44E-16    | 4.46102559  | 1.15E-05 | 0.006143326 | 0.70133701   |
| TRAM1          | 0.86660986  | -3.56E-16    | 4.432067744 | 1.30E-05 | 0.006829744 | 0.580007237  |
| CHST12         | 0.86529408  | 1.33E-16     | 4.424908042 | 1.34E-05 | 0.006905166 | 0.550116098  |

## Macrophage regulate B cell PD-L1 in HCC

|               |             |              |             |             |             |              |
|---------------|-------------|--------------|-------------|-------------|-------------|--------------|
| P4HB          | 0.859310644 | -147E-17     | 4.392375969 | 1.55E-05    | 0.007796376 | 0.414833453  |
| UAP1          | 0.853745377 | 1.08E-16     | 4.362155891 | 1.76E-05    | 0.008711579 | 0.289953767  |
| IGLV7-46      | 0.558034775 | -0.021375212 | 4.350128316 | 1.86E-05    | 0.009000757 | 0.240463488  |
| AL928768.3    | 0.843546753 | 3.46E-17     | 4.306871106 | 2.23E-05    | 0.010629427 | 0.0634706    |
| DNAJC3        | 0.841687424 | -5.54E-17    | 4.296805173 | 2.33E-05    | 0.01089296  | 0.022509075  |
| SLC38A10      | 0.835080421 | -5.82E-17    | 4.261068965 | 2.71E-05    | 0.012447749 | -0.122226366 |
| SDF2L1        | 0.831311722 | -6.86E-17    | 4.240707221 | 2.95E-05    | 0.013326447 | -0.204213496 |
| BRCC3         | 0.825202246 | -1.23E-17    | 4.207733078 | 3.39E-05    | 0.01482243  | -0.336243794 |
| PDGFD         | 0.766174473 | -0.006231362 | 4.20547567  | 3.42E-05    | 0.01482243  | -0.34524902  |
| DERL3         | 0.82433913  | 2.15E-16     | 4.203078074 | 3.46E-05    | 0.01482243  | -0.35480877  |
| CTNNAL1       | 0.817116176 | 5.81E-17     | 4.16415581  | 4.07E-05    | 0.017143286 | -0.509320371 |
| TXNDC11       | 0.810008547 | 2.24E-16     | 4.12591199  | 4.76E-05    | 0.019753658 | -0.659888025 |
| AC011043.1    | 0.606663498 | -0.017050895 | 4.099756994 | 5.30E-05    | 0.021643732 | -0.762145632 |
| STARD3        | 0.80268379  | 5.12E-17     | 4.086558363 | 5.60E-05    | 0.022487182 | -0.813526838 |
| SAMD3         | 0.640120018 | -0.014532134 | 4.063124422 | 6.16E-05    | 0.024359788 | -0.904387109 |
| TP53INP2      | 0.712478338 | -0.008636075 | 4.044219498 | 6.65E-05    | 0.025903592 | -0.97734514  |
| RRM2          | 0.788198231 | 1.72E-17     | 4.008904132 | 7.67E-05    | 0.029005306 | -1.112814874 |
| AARS          | 0.788179086 | 6.13E-18     | 4.00880165  | 7.67E-05    | 0.029005306 | -1.113206438 |
| CRB3          | 0.721255423 | -0.007217996 | 4.004375824 | 7.81E-05    | 0.029098075 | -1.130108114 |
| SEC11C        | 0.785120838 | -1.66E-17    | 3.992435898 | 8.19E-05    | 0.030090324 | -1.175621322 |
| CTD-3193K9.4  | 0.720592532 | -0.006928716 | 3.976894481 | 8.72E-05    | 0.031570448 | -1.234679382 |
| ABCB9         | 0.780366653 | 1.63E-17     | 3.967014329 | 9.07E-05    | 0.032384433 | -1.272116382 |
| AQP3          | 0.778268829 | -3.77E-17    | 3.955804444 | 9.48E-05    | 0.033399469 | -1.314490125 |
| POLA1         | 0.523294423 | -0.020627922 | 3.946237166 | 9.85E-05    | 0.034225331 | -1.350569135 |
| HCG27         | 0.695265491 | -0.008576369 | 3.937592989 | 0.000101939 | 0.034502028 | -1.383099185 |
| GLT8D1        | 0.774651669 | 7.14E-17     | 3.93648674  | 0.000102387 | 0.034502028 | -1.387257606 |
| TBC1D14       | 0.774221063 | 4.69E-17     | 3.934187966 | 0.000103324 | 0.034502028 | -1.395895385 |
| TYMS          | 0.768958415 | 2.02E-17     | 3.906109188 | 0.000115444 | 0.03805495  | -1.501034753 |
| WIPI1         | 0.767947113 | -1.48E-17    | 3.900716694 | 0.00011792  | 0.03837938  | -1.521148631 |
| SLC38A5       | 0.765038285 | 7.47E-17     | 3.885212055 | 0.000125326 | 0.039964823 | -1.578840389 |
| RP5-1068E13.7 | 0.703566587 | -0.006922695 | 3.884045093 | 0.0001259   | 0.039964823 | -1.583174155 |
| GPR155        | 0.762351397 | -4.51E-18    | 3.870898144 | 0.000132551 | 0.041562874 | -1.631916678 |
| AL109761.5    | 0.709547509 | -0.005609225 | 3.844391937 | 0.000146985 | 0.045533381 | -1.729733016 |
| RRAS          | 0.660596291 | -0.010214189 | 3.839270216 | 0.00014994  | 0.045895889 | -1.74856346  |
| LETM2         | 0.754536449 | -1.51E-17    | 3.82930737  | 0.00015585  | 0.04714375  | -1.785127402 |
| LMAN2         | 0.752286693 | 5.18E-19     | 3.817345767 | 0.000163237 | 0.048804135 | -1.828912782 |
